# Supplementary material for: Effects of Outdoor and Indoor Air Pollution on Respiratory Health of Chinese Children from 50 Kindergartens
Source: PubMed Central journal article supplement (PMC3709542; doi:10.2188/jea.je20120175), 2013-07-05
Supplement: je-23-280-s001.pdf [file je-23-280-s001.pdf]

eTable. Distribution of 3-year average concentrations ( $\mu\text{g}/\text{m}^3$ ) of air pollutants in 25 districts of 7 cities in Liaoning province, 2006-2008.

| City     | District | PM <sub>10</sub> | SO <sub>2</sub> | NO <sub>2</sub> |
|----------|----------|------------------|-----------------|-----------------|
| Shenyang | 1        | 133              | 51              | 32              |
|          | 2        | 123              | 44              | 36              |
|          | 3        | 116              | 42              | 42              |
|          | 4        | 145              | 78              | 45              |
|          | 5        | 134              | 58              | 38              |
| Dalian   | 6        | 142              | 61              | 44              |
|          | 7        | 159              | 68              | 51              |
|          | 8        | 134              | 52              | 46              |
|          | 9        | 91               | 50              | 33              |
| Anshan   | 10       | 126              | 78              | 31              |
|          | 11       | 137              | 64              | 40              |
|          | 12       | 120              | 48              | 32              |
| Benxi    | 13       | 142              | 46              | 45              |
|          | 14       | 127              | 41              | 47              |
|          | 15       | 155              | 62              | 41              |
| Fushun   | 16       | 171              | 80              | 42              |
|          | 17       | 133              | 69              | 37              |
|          | 18       | 128              | 37              | 33              |
|          | 19       | 87               | 37              | 30              |
| Liaoyang | 20       | 89               | 30              | 36              |
|          | 21       | 91               | 27              | 33              |
|          | 22       | 106              | 42              | 24              |
| Yingkou  | 23       | 100              | 20              | 26              |
|          | 24       | 137              | 50              | 33              |
|          | 25       | 79               | 23              | 21              |

PM<sub>10</sub>, particles with an aerodynamic diameter  $\leq 10 \mu\text{m}$ ; SO<sub>2</sub>, sulfur dioxide; NO<sub>2</sub>, nitrogen dioxides.
